# Supplementary material for: Prognostic nutritional index (PNI) as an influencing factor for in-hospital mortality in patients with stroke-associated pneumonia: a retrospective study
Source: PeerJ. 2025 Feb 26;13:e19028. doi: 10.7717/peerj.19028 (PMC11871890; doi:10.7717/peerj.19028)
Supplement: Supplemental Information 2 [file peerj-13-19028-s002.xlsx]

## Sheet: Sheet3
Sex	Age	BMI	LYM	FBG	TG	TC	HDL-C	LDL-C	ABL	Smoking (Yes/No)	T2DM (Yes/No)	Hypertension (Yes/No)	AF(Yes/No)	MV(Yes/No)	COPD(Yes/No)	SBP	DBP	In hospital mortality (Yes/No)	PNI	PNI group	NIHSS
female	81	22.2222	0.95	14.9	0.85	5.76	1.54	3.9	36.3	No	Yes	Yes	Yes	Yes	Yes	175	70	No	41.05	Low group	27
female	68	22.7732	5.58	5.84	1.59	2.9	1.4	1.76	34.2	No	No	Yes	Yes	Yes	Yes	122	60	No	62.1	High group	27
female	82	28.5156	1.54	6.83	2.3	2.8	0.5	1.3	47.06	No	Yes	Yes	No	Yes	Yes	125	76	No	54.76	High group	25
female	80	22.0386	1.58	7.11	0.7	4	1.5	2.2	41.6	No	Yes	Yes	No	Yes	Yes	145	68	No	49.5	High group	25
female	78	24.977	1.91	10.03	1.54	3.91	0.91	2.3	37.81	No	Yes	Yes	No	Yes	Yes	97	54	No	47.36	High group	25
female	66	24.2187	0.95	6.02	2.5	4.04	0.7	3.2	30.96	No	No	Yes	No	Yes	Yes	138	86	Yes	35.71	Low group	25
female	85	21.83	0.89	14.43	1.71	6.76	1.6	4.8	37.8	No	No	No	Yes	Yes	Yes	105	64	Yes	42.25	Low group	25
female	51	20.8117	3.36	4.29	1.69	3.82	1.17	2.22	38.7	No	No	Yes	No	Yes	Yes	142	75	No	55.5	High group	23
female	67	26.6667	1.78	6.88	1.92	4.44	0.92	3.13	35.4	No	No	Yes	No	Yes	No	201	74	No	44.3	Low group	23
female	75	25.7812	0.12	13.56	2.94	2.83	1	1.7	24.66	No	Yes	No	No	Yes	No	117	54	Yes	25.26	Low group	21
female	51	21.4844	1.68	6.91	2.61	7.3	0.84	5.27	36.76	No	No	Yes	No	Yes	No	85	63	No	45.16	High group	21
female	82	23.634	0.41	11.49	1.58	3.95	0.64	2.3	39.8	No	Yes	Yes	Yes	No	Yes	155	43	Yes	41.85	Low group	8
female	78	25.9695	0.53	20.67	1.05	2.45	0.93	1.55	39.7	No	Yes	Yes	Yes	No	Yes	176	66	No	42.35	Low group	8
female	77	24.3418	0.48	18.2	1.05	4.83	1.38	2.56	37.12	No	Yes	Yes	Yes	No	Yes	97	80	Yes	39.52	Low group	8
female	77	25.7812	0.48	18.2	1.05	3.83	0.77	3	37.12	No	Yes	Yes	Yes	No	Yes	113	92	No	39.52	Low group	8
female	73	21.3039	2.71	20.45	0.98	5.3	1.1	3.25	41	No	Yes	Yes	Yes	No	Yes	89	50	No	54.55	High group	8
female	67	24.7676	2.4	18.6	2.14	4.67	0.89	3.28	34.4	No	Yes	Yes	Yes	No	Yes	105	71	No	46.4	High group	8
female	79	24.0346	2.12	7.11	0.72	3.21	0.98	2.1	36	No	No	Yes	Yes	No	Yes	136	75	No	46.6	High group	8
female	65	24.093	1.71	8.37	0.8	3.79	0.7	2.8	36.8	No	No	Yes	Yes	No	Yes	143	65	Yes	45.35	High group	8
female	81	18.9745	1.39	10.96	0.58	4.32	1.02	3.04	39	No	Yes	Yes	No	No	Yes	128	78	No	45.95	High group	6
female	79	27.5873	1.88	15.86	2.43	6.02	1.13	4.25	40	No	Yes	Yes	No	No	Yes	117	64	No	49.4	High group	6
female	75	22.0317	1.15	9.35	1.5	3.21	0.98	1.74	41.9	No	Yes	Yes	No	No	Yes	128	85	No	47.65	High group	6
female	70	22.8928	1.69	13.38	1.21	4.83	1.78	2.64	45.9	No	Yes	Yes	No	No	Yes	95	70	No	54.35	High group	6
female	69	28	1.45	16.81	1.42	2.7	0.96	1.09	32.24	No	Yes	Yes	No	No	Yes	165	82	No	39.49	Low group	6
female	69	26.9531	0.91	15.72	1.88	2.54	0.93	1.37	36.8	No	Yes	Yes	No	No	Yes	138	74	No	41.35	Low group	6
female	66	27.2392	1.53	7.91	1.48	4.25	0.96	3.79	38	No	Yes	Yes	No	No	Yes	149	82	No	45.65	High group	6
female	77	23.4375	0.47	10.82	0.84	2.61	1.12	1.28	40.67	No	Yes	Yes	Yes	No	No	107	48	No	43.02	Low group	6
female	67	22.1893	0.79	10.16	1.71	3.76	0.74	2.16	36.38	No	Yes	Yes	Yes	No	No	156	82	No	40.33	Low group	6
female	68	29.5525	4.95	9.26	4.63	7.59	0.8	6.69	26.22	No	Yes	No	Yes	No	Yes	83	51	Yes	50.97	High group	6
female	62	23.4375	0.66	7.72	0.43	4.21	1.16	2.91	43	No	No	Yes	Yes	No	Yes	143	83	No	46.3	High group	6
female	69	28.3531	2.55	6.66	2.39	3.8	1.4	2	44.1	No	No	Yes	No	No	Yes	137	67	No	56.85	High group	6
female	79	21.875	1	8.3	0.62	3.99	1.21	2.46	38.1	No	No	Yes	Yes	No	No	170	80	No	43.1	Low group	6
female	75	21.7193	1.06	5.45	0.55	2.55	1.09	1.21	38.02	No	No	Yes	Yes	No	No	102	59	No	43.32	Low group	6
female	72	19.5918	0.67	7.7	1.24	6.21	2	4.45	47	No	No	Yes	Yes	No	No	120	80	No	50.35	High group	6
female	72	24.4646	2.67	26.04	1.24	2.86	0.89	1.64	28.9	No	No	Yes	Yes	No	No	139	68	No	42.25	Low group	6
female	67	21.0962	1.02	11.25	1.88	3.14	0.79	1.5	42.24	No	No	Yes	Yes	No	No	81	58	No	47.34	High group	6
female	74	23.0681	1.68	11.36	0.99	4.13	0.99	2.9	38.26	No	No	No	Yes	No	Yes	71	55	Yes	46.66	High group	6
female	59	31.2175	3.75	7.35	3.06	5.81	0.9	3.52	40.38	No	Yes	Yes	No	No	Yes	111	72	No	59.13	High group	4
female	80	27.1111	1.37	6.5	1.98	3.2	1	1.8	34.4	No	Yes	Yes	No	No	No	91	48	No	41.25	Low group	4
female	71	20.7756	2.99	9.93	4.22	4.32	0.97	2	40.1	No	Yes	Yes	No	No	No	168	82	No	55.05	High group	4
female	71	28.8889	3.34	5.7	2.48	4.34	1.54	3.09	36.5	No	Yes	Yes	No	No	No	150	72	No	53.2	High group	4
female	70	23.0469	0.49	13.64	6.1	3.61	0.7	0.67	48.64	No	Yes	Yes	No	No	No	143	71	No	51.09	High group	4
female	69	22.6562	0.61	18.73	0.77	2.23	1	1.2	37.1	No	Yes	Yes	No	No	No	106	73	Yes	40.15	Low group	4
female	67	20.202	2.84	6.63	2.74	3.78	1.15	1.91	40.15	No	Yes	Yes	No	No	No	158	95	No	54.35	High group	4
female	65	25.7812	1.88	11.55	1.88	2.63	1	1.49	39.6	No	Yes	Yes	No	No	No	147	93	No	49	High group	4
female	63	29.9688	1.13	16.91	1.97	3.92	1.02	2.7	37.2	No	Yes	No	Yes	No	Yes	106	79	No	42.85	Low group	4
female	79	24.974	2.75	18.16	2.19	7.19	1.22	5.22	42	No	Yes	No	No	No	Yes	134	69	No	55.75	High group	4
female	67	24.3438	2.33	7.22	1.44	3.2	1	1.6	37.1	No	Yes	No	No	No	Yes	120	80	No	48.75	High group	4
female	59	26.1224	1.43	5.34	0.5	3.2	0.8	1.6	35.7	No	No	Yes	No	No	Yes	120	61	No	42.85	Low group	4
female	53	25.9107	0.36	6.19	0.63	2.5	0.98	1.23	31.03	No	No	Yes	No	No	Yes	134	86	No	32.83	Low group	4
female	83	20.7031	2.19	5.64	1.42	4.96	0.78	3.53	39.79	No	No	Yes	No	No	No	129	71	No	50.74	High group	4
female	82	24.0346	6.29	18.61	2.2	3.41	1.11	1.3	40.94	No	No	Yes	No	No	No	105	60	No	72.39	High group	4
female	81	26.5625	0.69	6.75	0.84	2.61	0.87	1.36	37.71	No	No	Yes	No	No	No	89	56	No	41.16	Low group	4
female	79	20.9572	0.57	6.66	0.91	2.43	1.14	1.14	34.9	No	No	Yes	No	No	No	121	75	No	37.75	Low group	4
female	76	32.039	0.74	7.84	0.68	3.66	1.4	1.99	41.1	No	No	Yes	No	No	No	144	103	No	44.8	Low group	4
female	72	22.8928	0.83	5.46	0.78	3	0.8	1.6	32.09	No	No	Yes	No	No	No	124	74	No	36.24	Low group	4
female	71	24.6548	1.05	12.53	3.09	3.6	1.2	1.8	41.54	No	No	Yes	No	No	No	171	94	No	46.79	High group	4
female	70	23.7954	0.72	10.54	1.46	4	1.5	2.2	31.41	No	No	Yes	No	No	No	139	54	No	35.01	Low group	4
female	68	28.1943	1.3	6.98	2.03	3.24	0.88	2.24	34.3	No	No	Yes	No	No	No	138	65	No	40.8	Low group	4
female	67	26.7094	3.52	9.21	0.96	4	1.4	2	39.2	No	No	Yes	No	No	No	198	74	No	56.8	High group	4
female	83	22.6562	0.49	4.68	1.41	2.87	1.41	0.82	44.21	No	No	No	No	No	Yes	142	83	No	46.66	High group	4
female	64	34.7656	2.56	18.01	2.01	3.86	0.78	2.17	41.7	No	Yes	Yes	No	No	No	163	81	No	54.5	High group	2
female	59	24.2382	3.1	9.9	0.99	3.71	0.84	2.2	32.32	No	Yes	Yes	No	No	No	109	65	No	47.82	High group	2
female	58	25.8166	0.92	16.56	1.73	5.88	0.83	4.08	43.96	No	Yes	Yes	No	No	No	131	75	No	48.56	High group	2
female	52	22.6409	1.35	14.82	0.83	3.52	1	2.13	41.64	No	Yes	Yes	No	No	No	111	77	Yes	48.39	High group	2
female	63	28.8415	1.4	8.53	0.89	4.73	1.21	3.44	28.1	No	Yes	No	No	No	Yes	120	61	No	35.1	Low group	2
female	78	20.2848	1.87	12.09	1.43	4.72	1.27	2.55	34.84	No	Yes	No	No	No	No	120	54	No	44.19	Low group	2
female	70	26.6667	2.05	9.09	1.92	3.83	0.87	2.38	40.9	No	Yes	No	No	No	No	120	80	No	51.15	High group	2
female	60	19.5312	1.28	4.91	1.8	7.58	0.91	6.96	39.76	No	No	Yes	No	No	No	158	78	No	46.16	High group	2
female	59	25.5937	2.5	6.17	3.94	4.61	0.81	2.35	40.32	No	No	Yes	No	No	No	117	81	No	52.82	High group	2
female	59	25.7117	1.95	5.36	1.53	2.87	1	1.43	34.1	No	No	Yes	No	No	No	115	65	No	43.85	Low group	2
female	46	19.4734	1.32	5.4	1.22	4.21	1.02	2.64	40.06	No	No	Yes	No	No	No	144	84	No	46.66	High group	2
female	64	21.6441	2.04	9.57	1.59	4.17	0.68	2.77	37.22	No	No	No	No	No	Yes	125	65	No	47.42	High group	2
female	59	22.4996	0.94	4.87	1.39	1.7	0.54	0.89	32.54	No	No	No	No	No	Yes	110	69	No	37.24	Low group	2
female	33	25.2826	1.74	9	0.72	4.47	0.83	3.31	42.51	No	No	No	No	No	Yes	114	72	No	51.21	High group	2
female	97	20.9572	3.06	11.88	1.22	5.16	1	3.76	36.82	No	No	No	No	No	No	73	46	No	52.12	High group	2
female	88	28.3039	1.29	7.04	2.8	5.62	0.8	3.55	34.83	No	No	No	No	No	No	114	75	No	41.28	Low group	2
female	87	22.5466	0.5	7.97	0.76	3.57	0.89	2.33	39.1	No	No	No	No	No	No	145	88	No	41.6	Low group	2
female	79	23.4375	0.52	7.64	1.08	3.68	1	2.5	29.72	No	No	No	No	No	No	139	76	Yes	32.32	Low group	2
female	68	29.7211	2.49	5.52	1.46	2.62	0.87	1.69	35.7	No	No	No	No	No	No	126	73	No	48.15	High group	2
female	66	32.0312	2.63	7.77	3.95	6.8	0.74	4.26	40.66	No	No	No	No	No	No	92	44	No	53.81	High group	2
female	57	23.8281	1.97	7.66	1.08	3.31	1	2.29	39.37	No	Yes	No	No	No	No	88	56	Yes	49.22	High group	2
female	63	20.3954	0.99	4.41	0.75	3.22	1.32	1.75	43.7	No	No	No	No	No	No	135	85	No	48.65	High group	2
female	62	26.4463	1.54	6.34	0.56	6.36	1.07	5.34	40.2	No	No	No	No	No	No	150	83	No	47.9	High group	2
female	58	24.093	1.26	6.75	2.46	3.46	1.01	1.33	45.8	No	No	No	No	No	No	158	98	No	52.1	High group	2
female	43	27.3909	1.7	11.28	3.09	4.13	0.37	3.11	40	No	No	No	No	No	No	117	73	No	48.5	High group	2
male	78	22.4996	0.82	8.1	0.59	3.6	1.81	1.72	30.97	Yes	No	Yes	Yes	Yes	Yes	187	57	No	35.07	Low group	29
male	55	27.6817	2.44	19.37	1.04	2.57	0.51	1.59	35.46	Yes	Yes	Yes	Yes	Yes	Yes	102	74	No	47.66	High group	27
male	47	25.2595	0.83	14.06	1.33	2.29	0.72	1.35	38.1	Yes	Yes	Yes	No	Yes	Yes	119	75	No	42.25	Low group	25
male	70	33.2031	2.13	15.26	2.04	4.47	0.74	2.8	43.48	Yes	Yes	Yes	No	Yes	No	127	71	No	54.13	High group	25
male	52	27.4587	2.15	7.47	2.19	5.47	0.81	3.66	45.14	Yes	No	Yes	No	Yes	Yes	111	74	No	55.89	High group	25
male	56	19.5918	5.1	8.43	1.56	4.52	0.51	3.85	30.6	Yes	No	No	Yes	Yes	Yes	120	80	No	56.1	High group	25
male	75	28.3737	1.54	7.25	1.56	3.62	0.68	2.66	34.1	No	No	Yes	No	Yes	Yes	140	80	No	41.8	Low group	25
male	80	21.4536	1.33	10.01	0.98	3.47	1.8	2.02	39.5	Yes	Yes	No	No	Yes	No	128	85	No	46.15	High group	23
male	60	26.8923	0.53	24.57	1.73	4.06	1	3	34.71	No	Yes	Yes	No	Yes	Yes	156	86	Yes	37.36	Low group	23
male	72	32.112	1.65	15.7	1.42	3.94	0.86	2.43	40.66	No	Yes	Yes	No	Yes	No	127	77	No	48.91	High group	23
male	65	24.4898	1.83	22.12	1.21	2.89	0.89	1.45	45.33	No	Yes	Yes	No	Yes	No	135	89	No	54.48	High group	23
male	72	27.3797	1.07	10.22	4.24	4.37	0.75	1.69	39.6	No	Yes	No	No	Yes	Yes	120	80	No	44.95	Low group	23
male	50	24.8016	2.65	6.58	2.34	4.69	1.6	2.03	46.04	Yes	No	Yes	No	Yes	No	131	88	No	59.29	High group	23
male	78	18.424	0.96	8.92	0.75	4.01	0.66	3.01	37.87	No	No	Yes	No	Yes	No	110	67	No	42.67	Low group	23
male	58	24.6914	1.95	5.48	1.96	3.76	0.99	1.88	41.84	No	Yes	Yes	No	Yes	No	144	98	No	51.59	High group	21
male	62	21.1553	0.85	30.55	0.82	3.57	1.02	2.18	40.96	No	Yes	No	Yes	Yes	No	86	57	No	45.21	High group	21
male	64	22.4913	0.82	10.67	1.74	4.87	1.11	3.24	36.45	Yes	No	No	No	Yes	No	123	80	No	40.55	Low group	21
male	47	24.5779	0.99	15.71	1.8	3.8	1.4	2	45.5	Yes	No	No	No	Yes	No	130	90	Yes	50.45	High group	21
male	81	21.1073	0.19	25.04	0.66	4.37	1.2	2.6	34.58	Yes	Yes	Yes	Yes	No	Yes	122	80	Yes	35.53	Low group	12
male	63	22.8624	2.61	16	3.55	5.12	0.79	3.75	30.5	Yes	Yes	Yes	Yes	No	Yes	128	92	No	43.55	Low group	10
male	60	25.6896	1.79	5.8	2.64	4.9	0.7	3	30.53	Yes	Yes	Yes	Yes	No	Yes	170	87	No	39.48	Low group	10
male	83	26.4915	0.86	12.84	1.22	4.09	0.84	3.43	33	Yes	Yes	Yes	No	No	Yes	177	82	No	37.3	Low group	10
male	82	24.0569	0.59	28.28	1.5	3.96	0.91	2.48	37.62	No	Yes	Yes	Yes	No	Yes	112	69	No	40.57	Low group	10
male	79	21.9671	6.16	16.29	1.2	4.12	0.7	3.24	35.82	No	Yes	Yes	Yes	No	Yes	143	74	Yes	66.62	High group	10
male	75	24.3911	1.13	8.77	1.8	7.05	1.08	6.03	40.6	No	Yes	Yes	Yes	No	Yes	127	67	No	46.25	High group	10
male	67	23.6713	1.93	14.11	0.75	2.56	0.69	1.79	38.39	No	Yes	Yes	Yes	No	Yes	181	130	No	48.04	High group	10
male	81	28.9062	1.87	4.87	1.75	5.73	1.36	3.93	42.1	Yes	No	Yes	No	No	Yes	165	71	No	51.45	High group	10
male	78	27.9421	1.05	9.47	0.62	2.07	0.93	0.88	41	Yes	No	Yes	No	No	Yes	164	100	No	46.25	High group	10
male	73	23.6652	0.75	5.23	1.92	4.42	1.02	2.53	30.12	Yes	No	Yes	No	No	Yes	162	81	No	33.87	Low group	10
male	81	19.433	1.39	11.31	1.66	4.17	0.68	3.29	32.3	Yes	No	No	Yes	No	Yes	116	57	No	39.25	Low group	10
male	87	16.901	0.45	5.08	0.67	3.73	1.09	2.01	21.46	No	No	Yes	Yes	No	Yes	111	75	No	23.71	Low group	10
male	69	30.7174	2.31	5.34	1.42	3.85	1.24	1.96	44.27	No	No	Yes	Yes	No	Yes	83	58	No	55.82	High group	10
male	68	21.9713	3.69	7.78	1.17	3.85	1.05	2.27	43.91	No	No	Yes	Yes	No	Yes	113	77	Yes	62.36	High group	10
male	67	17.1468	1.18	6.26	1.67	3.98	0.73	2.49	41.11	No	No	Yes	Yes	No	Yes	159	89	No	47.01	High group	10
male	55	22.4913	1.03	13.58	1.45	3.16	0.97	2.1	35.9	Yes	Yes	Yes	No	No	Yes	88	52	Yes	41.05	Low group	8
male	53	28.3937	1.81	10.4	4.74	3.92	0.48	2.5	34.6	Yes	Yes	Yes	No	No	Yes	108	72	No	43.65	Low group	8
male	32	34.6861	2.3	11.91	6.55	4.32	0.82	2.78	43.9	Yes	Yes	Yes	No	No	Yes	110	70	No	55.4	High group	8
male	69	23.7228	2.21	10.27	2.71	4.39	0.87	2.29	44.99	Yes	Yes	Yes	No	No	No	120	80	No	56.04	High group	8
male	68	27.9904	1.24	5.54	2.45	2.53	0.6	1.22	40	Yes	Yes	Yes	No	No	No	110	54	No	46.2	High group	8
male	64	27.3437	3.01	19.23	0.95	4.63	1.11	3.19	36.6	No	Yes	Yes	Yes	No	Yes	148	74	No	51.65	High group	8
male	60	25.6896	1.16	8.55	0.39	4.13	1.31	2.64	30.36	No	Yes	Yes	Yes	No	Yes	119	66	No	36.16	Low group	8
male	84	28.3951	1.27	12.14	1.51	2.5	1.01	0.77	31.07	No	Yes	Yes	No	No	Yes	129	62	No	37.42	Low group	8
male	76	32.05	4.04	8.99	1.28	2.7	1.08	1.78	36.2	No	Yes	Yes	No	No	Yes	150	78	No	56.4	High group	8
male	76	26.2222	1.08	7.23	1.67	4.13	0.86	2.79	44.2	No	Yes	Yes	No	No	Yes	194	89	No	49.6	High group	8
male	72	22.5981	1.2	7.58	0.66	2.66	0.97	1.39	34.25	No	Yes	Yes	No	No	Yes	194	104	No	40.25	Low group	8
male	65	24.2187	0.64	8.46	1.56	4.45	0.71	3.25	37.98	No	Yes	Yes	No	No	Yes	98	63	No	41.18	Low group	8
male	69	25.9516	2.01	13.28	2.84	4.66	0.68	2.69	39.34	No	Yes	Yes	Yes	No	No	142	80	No	49.39	High group	8
male	62	27.7575	1.06	5.85	1.69	5.17	0.89	4.22	36.8	Yes	No	Yes	No	No	Yes	124	78	No	42.1	Low group	8
male	61	30.4611	1.36	5.15	2.22	5.16	0.95	3.34	45	Yes	No	Yes	No	No	Yes	179	109	No	51.8	High group	8
male	57	24.7252	1.52	3.91	2.7	3.87	1.04	2.69	43	Yes	No	Yes	No	No	Yes	110	70	No	50.6	High group	8
male	56	19.5918	0.34	8.73	2.16	3.01	0.38	2.6	26.52	Yes	No	Yes	No	No	Yes	120	80	Yes	28.22	Low group	8
male	51	30.7958	2.27	7.54	2.47	5.08	0.89	3.57	46.3	Yes	No	Yes	No	No	Yes	129	83	No	57.65	High group	8
male	57	23.9869	1.44	7.3	2.82	4.16	0.86	2.76	38.9	Yes	No	Yes	Yes	No	No	112	97	No	46.1	High group	8
male	56	30.6793	3.02	15.23	2.65	2.7	0.75	0.75	44.48	Yes	No	Yes	Yes	No	No	131	81	No	59.58	High group	8
male	51	28.4091	4.61	7.41	4.47	4.5	0.94	1.53	50.53	Yes	No	Yes	Yes	No	No	137	85	No	73.58	High group	8
male	46	24.3827	1.23	8.64	1.01	4.22	1.1	3.01	40.3	Yes	No	Yes	Yes	No	No	123	72	No	46.45	High group	8
male	78	25.3515	1.25	6.25	1.29	3.7	0.95	2.46	38.54	Yes	No	Yes	No	No	No	130	74	No	44.79	Low group	8
male	72	19.3625	1.19	6.8	0.86	4.85	0.82	3.64	36.07	Yes	No	Yes	No	No	No	117	68	No	42.02	Low group	8
male	70	24.3375	1.12	6.91	1.3	4.52	0.96	2.83	39.11	Yes	No	Yes	No	No	No	148	79	No	44.71	Low group	8
male	66	26.8122	1.04	8.8	2.05	3.72	0.88	2.46	38.2	Yes	No	Yes	No	No	No	133	67	No	43.4	Low group	8
male	60	24.3418	0.7	5.84	1.6	3.67	0.99	2.6	35.32	Yes	No	No	Yes	No	Yes	120	80	Yes	38.82	Low group	8
male	80	22.0932	1.36	5.89	0.83	3.92	1.21	2.11	37.31	Yes	No	No	No	No	Yes	123	77	No	44.11	Low group	8
male	72	22.7732	0.82	6.32	1.29	3.54	1.34	1.61	39.69	Yes	No	No	No	No	Yes	159	79	No	43.79	Low group	8
male	66	25.3086	0.58	5.17	0.5	3.2	0.8	1.6	31.7	Yes	No	No	No	No	Yes	113	71	No	34.6	Low group	8
male	61	26.2336	1.37	4.68	1.27	3.56	1.01	1.97	40.61	No	No	Yes	Yes	No	Yes	124	72	No	47.46	High group	8
male	54	26.1738	1.33	8.28	4.74	6.22	1.04	3.03	53.5	No	No	Yes	Yes	No	Yes	105	63	No	60.15	High group	8
male	34	26.8745	2.2	7.8	3.06	4	1.5	2.2	52.8	No	No	Yes	Yes	No	Yes	167	97	No	63.8	High group	8
male	87	25.8264	3.32	4.48	0.85	3.43	1.55	1.96	39.2	No	No	Yes	No	No	Yes	140	80	No	55.8	High group	8
male	78	26.9896	0.9	7.49	1.49	2.55	0.64	1.62	44.5	No	No	Yes	No	No	Yes	110	56	No	49	High group	8
male	76	20.4783	0.78	5.28	0.66	2.02	0.58	1.14	32	No	No	Yes	No	No	Yes	110	61	No	35.9	Low group	8
male	72	23.533	0.58	6.8	0.38	3.48	0.99	2.22	38.7	No	No	Yes	No	No	Yes	120	80	No	41.6	Low group	8
male	70	21.9713	1.88	5.41	2.83	4.28	1.13	1.86	42.51	No	No	Yes	No	No	Yes	150	79	No	51.91	High group	8
male	67	27.9904	2.4	5.63	1.23	3.88	0.53	2.79	40.35	No	No	Yes	No	No	Yes	102	66	No	52.35	High group	8
male	81	31.6443	0.7	7.12	5.76	5.45	0.99	1.84	44.68	No	No	Yes	Yes	No	No	167	118	No	48.18	High group	8
male	73	18.424	3.09	10.28	0.87	3.76	1.05	3.26	58.8	No	No	Yes	Yes	No	No	168	82	No	74.25	High group	8
male	70	24.2215	3.09	7.89	3.97	4.2	1.5	2.4	35.7	No	No	Yes	Yes	No	No	125	69	No	51.15	High group	8
male	69	22.7244	0.9	4.47	1.89	3.61	0.91	1.84	39.18	No	No	Yes	Yes	No	No	128	93	No	43.68	Low group	8
male	68	23.5102	0.79	16.27	1.44	3	0.82	1.53	44.94	No	No	Yes	Yes	No	No	162	94	No	48.89	High group	8
male	66	30.8594	0.64	5.38	4.77	5.21	0.59	2.45	40.41	No	No	Yes	Yes	No	No	148	91	No	43.61	Low group	8
male	66	27.7634	2.4	4.7	2.83	6.17	0.8	4.08	41.39	No	No	No	Yes	No	Yes	113	77	No	53.39	High group	8
male	64	27.1314	2.63	11.3	1.2	3.8	1.4	2	42.65	Yes	Yes	Yes	No	No	No	113	77	No	55.8	High group	6
male	62	32.2708	2.33	8.67	1.36	3.84	0.86	2.88	38.7	Yes	Yes	Yes	No	No	No	131	65	No	50.35	High group	6
male	55	24.4898	1.57	4.82	2.56	4.03	1.1	2.94	38.9	Yes	Yes	Yes	No	No	No	133	80	No	46.75	High group	6
male	54	24.1672	1.48	13.08	1.5	3.37	0.99	1.7	41.64	Yes	Yes	Yes	No	No	No	152	91	No	49.04	High group	6
male	53	27.7177	3.2	7.18	5.49	3.86	0.84	2.4	45.8	Yes	Yes	Yes	No	No	No	167	83	No	61.8	High group	6
male	53	24.2215	3.18	7.5	0.8	4.2	1.5	2.2	21.3	Yes	Yes	Yes	No	No	No	166	99	No	37.2	Low group	6
male	49	26.5759	3.28	14.31	1.67	3.45	0.73	2.05	38.19	Yes	Yes	Yes	No	No	No	183	120	No	54.59	High group	6
male	49	24.9337	2.91	6.46	1.4	2.79	0.76	1.93	42.1	Yes	Yes	Yes	No	No	No	131	104	No	56.65	High group	6
male	39	23.0546	2.18	13.17	1.44	5.91	1.41	3.64	42.8	Yes	Yes	Yes	No	No	No	149	113	No	53.7	High group	6
male	64	25.5937	1.25	13.75	3.1	5.12	1.18	3.24	41.4	No	Yes	Yes	No	No	Yes	131	79	No	47.65	High group	6
male	62	24.7676	2.59	15.08	0.92	2.36	0.78	1.16	33.48	No	Yes	Yes	No	No	Yes	125	65	No	46.43	High group	6
male	51	25.8806	1.01	7.29	0.54	2.13	0.52	1.41	23.06	No	Yes	Yes	No	No	Yes	132	68	Yes	28.11	Low group	6
male	40	22.4784	1.5	11.77	2.1	4.21	0.9	2.36	38.73	No	Yes	Yes	No	No	Yes	174	116	No	46.23	High group	6
male	62	22.7732	1.04	10.97	0.63	2.72	0.87	1.56	37.1	No	Yes	Yes	Yes	No	No	144	75	No	42.3	Low group	6
male	56	28.4055	1.85	15.92	1.74	2.82	0.82	1.67	36.57	No	Yes	Yes	Yes	No	No	118	79	No	45.82	High group	6
male	55	34.7222	2.38	6.13	1.73	3.75	0.83	2.63	43	No	Yes	Yes	Yes	No	No	136	93	No	54.9	High group	6
male	76	24.9135	2.29	9.4	2.45	4.24	1.15	1.98	43.93	No	Yes	Yes	No	No	No	143	79	No	55.38	High group	6
male	66	31.2213	2.18	5.5	0.5	4.2	1.6	2.4	45.94	No	Yes	Yes	No	No	No	159	89	No	56.84	High group	6
male	78	24.8016	2.22	13.76	1.44	3.6	0.8	2.15	35.25	No	Yes	No	No	No	Yes	140	62	No	46.35	High group	6
male	71	27.102	2.09	7.29	1.05	2.82	0.72	1.72	39.7	No	Yes	No	No	No	Yes	139	62	No	50.15	High group	6
male	71	24.8163	0.75	8.85	1.37	3.6	1	1.8	35.7	No	Yes	No	No	No	Yes	120	80	No	39.45	Low group	6
male	70	26.3656	1.58	7.54	3.36	3.65	0.94	1.18	34.19	No	Yes	No	No	No	Yes	105	66	No	42.09	Low group	6
male	73	24.4898	1.32	19.17	3.24	4.15	0.58	3.5	33.2	No	Yes	No	Yes	No	No	137	74	Yes	39.8	Low group	6
male	68	25.9095	1.28	6.89	0.77	2.08	0.87	1.14	37.6	No	Yes	No	Yes	No	No	100	67	No	44	Low group	6
male	64	23.8751	0.83	6.36	0.68	3.56	1.46	2.38	37.8	Yes	No	Yes	No	No	No	105	61	No	41.95	Low group	6
male	63	24.9135	2.79	6.47	3.56	3.91	1.17	2.2	43.98	Yes	No	Yes	No	No	No	158	82	Yes	57.93	High group	6
male	61	29.0657	1.11	7.58	0.68	3.01	0.74	1.96	37.74	Yes	No	Yes	No	No	No	133	84	No	43.29	Low group	6
male	60	30.8594	1.83	5.42	2.84	6.29	0.95	4.05	38.29	Yes	No	Yes	No	No	No	189	131	No	47.44	High group	6
male	59	28.4055	1.44	8.54	2.92	4.79	0.77	2.69	44.09	Yes	No	Yes	No	No	No	126	82	No	51.29	High group	6
male	59	24.4193	3.14	4.89	3.48	4.03	0.82	2.86	42.46	Yes	No	Yes	No	No	No	130	77	No	58.16	High group	6
male	58	25.2493	1.65	12.2	2.09	5.78	1	4.15	40.3	Yes	No	Yes	No	No	No	131	86	No	48.55	High group	6
male	58	25.3934	2.16	5.63	1.04	4.01	1.11	2.44	40.97	Yes	No	Yes	No	No	No	159	95	No	51.77	High group	6
male	57	25.0593	2.13	4.97	2.17	4.24	1.17	3.01	37.1	Yes	No	Yes	No	No	No	121	85	No	47.75	High group	6
male	56	26.8274	1.48	7.97	0.88	2.9	1.18	2.18	40.4	Yes	No	Yes	No	No	No	115	76	No	47.8	High group	6
male	54	29.7458	2.82	3.96	1.5	3.38	0.69	2.14	34.7	Yes	No	Yes	No	No	No	106	70	No	48.8	High group	6
male	53	26.6436	3.22	6.09	1.98	3.8	0.84	3.03	41	Yes	No	Yes	No	No	No	165	103	No	57.1	High group	6
male	52	31.4564	2.44	7.06	1.65	7.26	1.1	5.53	41.6	Yes	No	Yes	No	No	No	110	62	No	53.8	High group	6
male	50	26.1224	1.53	7.31	4.12	3.24	0.89	2.06	44.33	Yes	No	Yes	No	No	No	130	80	No	51.98	High group	6
male	49	26.9274	3.03	5.97	2.7	4.58	0.69	2.66	41.24	Yes	No	Yes	No	No	No	147	92	No	56.39	High group	6
male	49	29.0698	2.22	5.72	0.92	3.44	1.27	1.75	43.73	Yes	No	Yes	No	No	No	136	84	No	54.83	High group	6
male	49	25.963	4.15	4.71	2.11	3.55	0.75	2.17	38.9	Yes	No	Yes	No	No	No	110	72	No	59.65	High group	6
male	49	28.7274	1.12	4.59	2.27	3.17	0.87	2.3	40.18	Yes	No	Yes	No	No	No	116	78	No	45.78	High group	6
male	49	24.8163	2.5	3.26	0.5	2.8	0.6	1.4	37	Yes	No	Yes	No	No	No	127	60	No	49.5	High group	6
male	48	26.1224	0.48	18.2	1.05	3.83	0.77	2.56	37.12	Yes	No	Yes	No	No	No	117	86	No	39.52	Low group	6
male	47	26.8122	2.51	11.8	1.92	5.46	1.04	3.55	51.47	Yes	No	Yes	No	No	No	156	96	No	64.02	High group	6
male	46	32.8241	1.72	4.44	1.29	2.53	0.75	1.19	43.08	Yes	No	Yes	No	No	No	127	80	No	51.68	High group	6
male	45	29.6296	1.16	6.3	3.16	4.34	0.81	2.09	36.27	Yes	No	Yes	No	No	No	141	81	No	42.07	Low group	6
male	43	20.0155	4.48	6.81	0.86	3.79	0.96	2.44	41.81	Yes	No	Yes	No	No	No	105	59	No	64.21	High group	6
male	42	26.4236	1.21	9.2	2.43	3.6	1.2	1.9	43	Yes	No	Yes	No	No	No	105	68	No	49.05	High group	6
male	42	24.2215	3.81	7.59	4.1	3.2	1	1.6	37.96	Yes	No	Yes	No	No	No	109	62	No	57.01	High group	6
male	39	33.1398	2.2	4.45	1.28	4.91	0.73	3.6	40.72	Yes	No	Yes	No	No	No	127	88	No	51.72	High group	6
male	61	30.6793	1.47	7.12	1.13	2.46	0.73	1.22	43.26	Yes	No	No	No	No	Yes	163	99	No	50.61	High group	6
male	52	22.8571	1.27	4.94	1.07	2.9	0.47	1.94	37.75	Yes	No	No	No	No	Yes	124	74	No	44.1	Low group	6
male	50	26.7755	1.22	6.43	1.17	4.34	0.96	3.53	40.9	Yes	No	No	No	No	Yes	106	88	No	47	High group	6
male	49	26.6436	2.31	7.23	5.35	4	1.5	2.2	34.3	Yes	No	No	No	No	Yes	120	81	No	45.85	High group	6
male	43	23.5294	4.07	4.81	1.16	4.26	0.69	3.21	47.32	Yes	No	No	No	No	Yes	113	74	No	67.67	High group	6
male	39	24.4898	2.61	5.29	2.7	5.52	0.47	3.82	34.33	Yes	No	No	No	No	Yes	107	71	No	47.38	High group	6
male	54	21.048	0.75	5.14	1.56	3.71	0.86	2.32	40.7	Yes	No	No	Yes	No	No	120	70	No	44.45	Low group	6
male	52	22.9481	1.61	8.51	1.38	3.06	0.71	2.11	30.95	Yes	No	No	Yes	No	No	110	67	No	39	Low group	6
male	48	23.5102	2.78	7.87	2.11	5.16	0.8	4.5	45.53	Yes	No	No	Yes	No	No	102	64	No	59.43	High group	6
male	81	20.7612	0.99	8.02	1.35	4.74	0.54	3.59	33.15	Yes	No	No	No	No	No	127	83	No	38.1	Low group	6
male	75	18.6453	2.2	22.13	0.9	3.15	0.83	2.17	34.7	Yes	No	No	No	No	No	120	80	No	45.7	High group	6
male	53	30.8594	0.82	6.54	2.75	3	0.6	1.5	34.4	No	No	Yes	No	No	Yes	150	80	No	38.5	Low group	6
male	50	24.6914	3.14	6.54	2.11	5.52	1.29	3.83	44.5	No	No	Yes	Yes	No	No	95	62	No	60.2	High group	6
male	84	20.7612	1.91	6.44	0.43	4.69	1.53	2.89	41.43	No	No	Yes	No	No	No	145	65	No	50.98	High group	6
male	81	26.5285	1.16	6.23	1.01	4.23	0.94	2.86	42.75	No	No	Yes	No	No	No	109	43	No	48.55	High group	6
male	72	24.0346	1.05	4.2	4.79	4.03	1.1	2.72	36.1	No	No	Yes	No	No	No	155	96	No	41.35	Low group	6
male	76	20.984	1.27	4.04	1.12	3	0.6	1.4	31.66	No	No	No	No	No	Yes	125	58	No	38.01	Low group	6
male	75	28.3987	1.14	6.46	0.5	4.2	1.6	2.4	28.75	No	No	No	No	No	Yes	132	55	Yes	34.45	Low group	6
male	73	24.2123	0.82	15.15	0.7	4.25	0.87	3.06	33.94	No	No	No	No	No	Yes	110	71	No	38.04	Low group	6
male	71	25.6055	2.55	6.53	1.28	4.46	1.44	2.78	41.6	No	No	No	No	No	Yes	130	80	No	54.35	High group	6
male	66	22.7732	0.97	4.93	0.71	2.56	1.1	1.3	17.53	No	No	No	No	No	Yes	93	41	Yes	22.38	Low group	6
male	65	22.4913	2.16	5.64	1.2	3.63	1.18	1.9	41.05	No	No	No	No	No	Yes	114	71	No	51.85	High group	6
male	62	30.4687	3.12	5.41	1.45	3.14	0.81	2.26	40	Yes	Yes	No	No	No	No	113	63	No	55.6	High group	4
male	61	24.4418	3.64	14.5	2.63	5.13	0.9	3.35	41.51	Yes	Yes	No	No	No	No	126	78	No	59.71	High group	4
male	59	23.8367	1.1	34	0.71	2.79	1.16	1.31	38.07	Yes	Yes	No	No	No	No	138	81	No	43.57	Low group	4
male	56	29.0612	0.98	2.07	1.82	2.63	0.47	1.33	38.96	Yes	Yes	No	No	No	No	96	70	No	43.86	Low group	4
male	53	26.0262	1.46	13.29	1.86	4.67	0.85	3.71	40.7	Yes	Yes	No	No	No	No	111	52	No	48	High group	4
male	52	26.1719	1.6	14.41	3.55	2.8	0.5	1.3	41.55	Yes	Yes	No	No	No	No	122	77	No	49.55	High group	4
male	52	26.3656	1.51	13.84	2.05	3.54	0.66	1.95	38.13	Yes	Yes	No	No	No	No	145	75	No	45.68	High group	4
male	51	26.3656	2.54	8.16	2.52	5.08	0.74	3.37	42.4	Yes	Yes	No	No	No	No	89	66	No	55.1	High group	4
male	50	26.556	1.77	10.16	11.27	5.67	0.68	3.11	38.2	Yes	Yes	No	No	No	No	152	102	No	47.05	High group	4
male	42	30.4498	1.87	7.17	1.43	3.75	0.93	2.17	36.85	Yes	Yes	No	No	No	No	141	90	No	46.2	High group	4
male	42	26.2976	4.25	5.33	1.61	2.31	0.87	1.56	39.8	Yes	Yes	No	No	No	No	108	76	No	61.05	High group	4
male	63	20.9573	0.49	18.06	1.85	3.81	1.18	2	30.07	No	Yes	Yes	No	No	No	109	61	Yes	32.52	Low group	4
male	63	32.526	1.62	8.4	0.97	3.25	0.76	2.05	44.13	No	Yes	Yes	No	No	No	121	95	No	52.23	High group	4
male	61	29.5525	0.87	10.72	1.54	5.63	1.16	4.49	41.9	No	Yes	Yes	No	No	No	113	79	No	46.25	High group	4
male	61	24.3375	1.18	15.7	2.44	3.59	0.61	1.92	37	No	Yes	Yes	No	No	No	122	70	No	42.9	Low group	4
male	57	22.5306	0.94	21.87	3.9	6.25	1.11	3.37	42.67	No	Yes	Yes	No	No	No	144	86	No	47.37	High group	4
male	55	24.1633	1.73	22.85	2.87	4.85	0.68	3.41	42.05	No	Yes	Yes	No	No	No	167	89	No	50.7	High group	4
male	52	31.1419	1.07	10.4	0.7	3.6	1	1.8	38.98	No	Yes	Yes	No	No	No	155	95	No	44.33	Low group	4
male	44	31.378	1.21	19.75	2.92	4.08	0.96	2.74	40.9	No	Yes	Yes	No	No	No	138	82	No	46.95	High group	4
male	83	20.7157	1.5	10.4	0.76	4.74	0.92	3.47	36.51	No	Yes	No	No	No	No	131	84	No	44.01	Low group	4
male	72	25.3906	1.35	11.02	1.54	2.8	0.6	1.4	30.31	No	Yes	No	No	No	No	153	74	No	37.06	Low group	4
male	63	25.7117	1.58	6.9	3.18	6.27	0.78	4.73	40.7	Yes	No	No	No	No	No	129	71	No	48.6	High group	4
male	62	25.2595	1.6	4.91	0.84	2.62	0.57	1.82	35.1	Yes	No	No	No	No	No	115	60	No	43.1	Low group	4
male	61	28.3782	1	7.8	1.16	4.82	1	3.61	38.2	Yes	No	No	No	No	No	114	61	No	43.2	Low group	4
male	59	24.4898	3.69	4.78	0.88	4.1	1.09	2.71	40.38	Yes	No	No	No	No	No	99	51	No	58.83	High group	4
male	55	22.9854	1.87	10.68	1.56	5.33	1.21	3.41	39.58	Yes	No	No	No	No	No	136	71	No	48.93	High group	4
male	54	28.6851	1.94	8.26	4.04	3.59	0.81	0.94	39.99	Yes	No	No	No	No	No	134	81	No	49.69	High group	4
male	54	25.2595	2.17	5.93	2.58	5.27	0.79	3.31	40.22	Yes	No	No	No	No	No	123	72	No	51.07	High group	4
male	54	24.9135	2.75	5.75	1.05	4.26	1.2	2.58	41.37	Yes	No	No	No	No	No	109	74	No	55.12	High group	4
male	54	25.2493	1.95	5.04	0.89	2.06	0.64	1.09	38.4	Yes	No	No	No	No	No	102	77	No	48.15	High group	4
male	53	22.7244	2.85	4.17	0.98	3.62	1.52	1.65	43.65	Yes	No	No	No	No	No	131	88	No	57.9	High group	4
male	51	24.8358	1.02	14.47	1.3	3.8	1.2	2	37.7	Yes	No	No	No	No	No	110	80	Yes	42.8	Low group	4
male	51	21.9713	1.18	6.49	0.8	4.78	1.1	3.5	42.72	Yes	No	No	No	No	No	146	87	No	48.62	High group	4
male	51	24.3824	0.87	5.21	1.72	2.09	0.85	0.9	45	Yes	No	No	No	No	No	126	83	No	49.35	High group	4
male	51	30.3461	2.43	5.16	2.94	5.58	0.96	3.73	38.6	Yes	No	No	No	No	No	105	70	No	50.75	High group	4
male	50	28.3266	1.95	9.3	1.29	4.66	1.61	2.46	43.23	Yes	No	No	No	No	No	105	74	No	52.98	High group	4
male	50	25.0995	3.25	3.58	2.4	4.51	0.85	2.57	39.53	Yes	No	No	No	No	No	130	80	No	55.78	High group	4
male	50	26.7755	1.37	10.48	2.12	3.88	0.87	2.64	36.9	Yes	No	No	No	No	No	137	90	No	43.75	Low group	4
male	49	26.5731	2.86	10.33	4.33	4.5	0.74	3.16	37.5	Yes	No	No	No	No	No	149	97	No	51.8	High group	4
male	49	21.4533	2.47	5.28	2.59	4.97	0.76	3.03	37.61	Yes	No	No	No	No	No	120	80	No	49.96	High group	4
male	48	27.6601	3.85	5.56	2.37	5.44	0.78	3.58	41.2	Yes	No	No	No	No	No	114	82	No	60.45	High group	4
male	48	26.1224	4.33	4.66	0.87	4.75	0.81	3.54	40.82	Yes	No	No	No	No	No	119	74	No	62.47	High group	4
male	48	26.5432	3.28	4.37	0.83	4	1.4	2	34	Yes	No	No	No	No	No	105	60	No	50.4	High group	4
male	46	21.7181	1.96	8.44	1.49	3.3	0.72	2.73	41.5	Yes	No	No	No	No	No	142	86	No	51.3	High group	4
male	46	24.0741	1.62	6.96	4.14	5.32	0.76	2.68	44.66	Yes	No	No	No	No	No	121	76	No	52.76	High group	4
male	46	26.6097	1.91	6.41	0.7	3.72	0.8	2.75	38.9	Yes	No	No	No	No	No	120	78	No	48.45	High group	4
male	45	27.5482	1.61	9.08	1.1	3.2	1	1.8	44.1	Yes	No	No	No	No	No	158	89	No	52.15	High group	4
male	45	25.2595	2	5.43	2.88	5.26	0.86	3.09	46.7	Yes	No	No	No	No	No	116	62	No	56.7	High group	4
male	44	27.4406	1.21	7.9	1.52	4.65	0.99	2.97	39.09	Yes	No	No	No	No	No	135	86	No	45.14	High group	4
male	43	21.4692	0.54	5.46	0.63	6.72	1.12	5.55	43.27	Yes	No	No	No	No	No	109	69	No	45.97	High group	4
male	43	24.0741	3	5.18	1.12	3.12	0.93	2.22	39.2	Yes	No	No	No	No	No	115	74	No	54.2	High group	4
male	42	28.3737	3.84	4.97	2.63	4.39	0.78	2.41	42.65	Yes	No	No	No	No	No	121	76	No	61.85	High group	4
male	39	27.4286	2.83	5.04	2.16	4.98	0.57	3.31	40.1	Yes	No	No	No	No	No	115	65	No	54.25	High group	4
male	38	24.8016	1.23	6.05	1.87	6.03	0.87	4.19	41.29	Yes	No	No	No	No	No	101	65	No	47.44	High group	4
male	38	23.8367	2.42	5.07	0.8	4.48	0.94	3.11	39.87	Yes	No	No	No	No	No	93	56	No	51.97	High group	4
male	32	34.6122	4.74	5.53	2.15	5.01	0.84	3.23	46.9	Yes	No	No	No	No	No	105	60	No	70.6	High group	4
male	21	27.6817	3.86	3.69	0.79	3.6	1.2	1.8	43	Yes	No	No	No	No	No	147	95	No	62.3	High group	4
male	57	22.7583	1.74	4.46	2.13	6.96	0.91	5.36	41.6	No	No	Yes	No	No	No	128	66	No	50.3	High group	4
male	51	29.7458	1.94	4.56	0.5	3	0.8	1.5	41.3	No	No	Yes	No	No	No	108	79	No	51	High group	4
male	51	22.4059	0.98	6.99	2.03	3.23	0.76	1.55	39.64	No	No	Yes	No	No	No	120	72	No	44.54	Low group	4
male	47	32.4661	1.85	5.47	2.44	4.39	0.74	2.54	46.11	No	No	Yes	No	No	No	147	82	No	55.36	High group	4
male	45	26.2649	2.6	5.42	2.61	4.34	1.15	2.57	41.8	No	No	Yes	No	No	No	154	92	No	54.8	High group	4
male	45	24.5675	2.6	5.03	1.17	3.55	0.64	3.07	41.8	No	No	Yes	No	No	No	117	69	No	54.8	High group	4
male	41	31.5221	1.43	4.02	2.24	5.23	0.62	4.32	37.37	No	No	Yes	No	No	No	116	85	No	44.52	Low group	4
male	40	26.7698	3.74	6.26	3.43	5.16	1.08	3.62	41.5	No	No	Yes	No	No	No	148	102	No	60.2	High group	4
male	34	25.9516	2.12	7.08	0.6	3	0.8	1.6	37.94	No	No	Yes	No	No	No	111	90	No	48.54	High group	4
male	61	22.231	2.91	9.42	1.81	5.12	0.67	3.63	37.56	No	No	No	No	No	Yes	120	72	No	52.11	High group	4
male	59	25.4694	1.15	5.14	0.7	4.11	1.03	2.47	36.78	No	No	No	No	No	Yes	132	72	No	42.53	Low group	4
male	51	22.6757	0.84	10.36	0.5	2.91	0.91	2.3	32.3	No	No	No	Yes	No	No	110	70	No	36.5	Low group	4
male	91	21.9713	1.31	8.02	0.9	3.8	1.2	1.9	37.82	No	No	No	No	No	No	141	74	Yes	44.37	Low group	4
male	84	23.2335	0.57	5.58	0.43	2.86	1.2	1.26	33.87	No	No	No	No	No	No	144	87	Yes	36.72	Low group	4
male	78	25.5102	4.19	7.46	1.32	4.46	0.92	2.94	41.51	No	No	No	No	No	No	112	60	No	62.46	High group	4
male	77	21.6713	0.95	5.79	1.16	5.02	1.07	3.42	42.94	No	No	No	No	No	No	105	60	No	47.69	High group	4
male	76	33.564	1.6	5.71	2.17	7.2	0.69	5.64	38.2	No	No	No	No	No	No	119	77	No	46.2	High group	4
male	71	23.1405	1.58	4.16	0.91	3.26	1.1	2.1	37.4	No	No	No	No	No	No	148	70	No	45.3	High group	4
male	68	19.3625	0.84	3.55	0.65	2.59	0.99	1.3	36	No	No	No	No	No	No	101	68	No	40.2	Low group	4
male	66	22.1003	1.31	4.6	0.62	2.44	1.05	1.33	35	No	No	No	No	No	No	120	80	No	41.55	Low group	4
male	63	27.7008	0.84	7	0.49	4.2	1.6	2.4	40.56	No	Yes	No	No	No	No	118	62	No	44.76	Low group	2
male	58	21.9525	1.38	12.7	1.87	4.13	0.99	3.16	48.2	No	Yes	No	No	No	No	137	98	No	55.1	High group	2
male	54	24.4418	2.21	8.27	2.24	5.19	0.56	3.61	37.58	No	Yes	No	No	No	No	124	77	No	48.63	High group	2
male	63	36.3322	1.58	5.99	3	5.25	0.83	3.06	40.03	No	No	No	No	No	No	121	73	No	47.93	High group	2
male	61	24.3375	3.05	5.84	2.42	5.96	0.87	3.99	41.81	No	No	No	No	No	No	173	101	No	57.06	High group	2
male	58	26.1224	1.79	9.01	0.75	3.45	0.88	2.42	35.5	No	No	No	No	No	No	108	58	No	44.45	Low group	2
male	57	26.1224	2.19	9.28	3.78	5.48	0.66	3.13	38.6	No	No	No	No	No	No	134	37	No	49.55	High group	2
male	57	23.1405	1.1	4.78	0.88	4.1	1.09	2.71	40.38	No	No	No	No	No	No	140	79	No	45.88	High group	2
male	56	24.0238	2.59	4.59	3.54	5.2	0.78	2.81	45.1	No	No	No	No	No	No	125	75	No	58.05	High group	2
male	51	22.9854	1.7	6.06	1.16	3	1.38	1.17	34.2	No	No	No	No	No	No	100	55	Yes	42.7	Low group	2
male	49	26.8544	0.63	8.05	0.83	5.41	1.18	4.13	39.3	No	No	No	No	No	No	121	78	No	42.45	Low group	2
male	48	26.2596	0.55	8.51	2.07	5.41	0.9	3.57	42.42	No	No	No	No	No	No	127	79	No	45.17	High group	2
male	47	34.4222	3	7.12	1.65	3.34	1.24	2.4	48.1	No	No	No	No	No	No	109	73	No	63.1	High group	2
male	46	26.4236	1.2	6.62	4.29	4.47	1.04	1.48	45.11	No	No	No	No	No	No	125	82	No	51.11	High group	2
male	46	33.0579	2.5	5.36	1.49	3.72	1.06	2.65	43.8	No	No	No	No	No	No	130	70	No	56.3	High group	2
male	44	23.5102	2.52	6.44	1.58	5.35	0.93	3.7	47	No	No	No	No	No	No	127	101	No	59.6	High group	2
male	44	34.6809	3.72	6.09	5.85	3.28	0.77	1.5	42.75	No	No	No	No	No	No	110	80	No	61.35	High group	2
male	39	25.3515	3.59	5.76	1.25	4.72	1.12	3.45	41.7	No	No	No	No	No	No	117	70	No	59.65	High group	2
male	37	24.2215	1.32	7.78	1.73	4.3	1.09	2.42	44.17	No	No	No	No	No	No	120	84	No	50.77	High group	2
male	31	24.3438	1.06	8.53	1.24	2.76	0.48	1.72	29.27	No	No	No	No	No	No	120	70	No	34.57	Low group	2
